# Supplementary material for: DIX Domain Polymerization Drives Assembly of Plant Cell Polarity Complexes
Source: PubMed Central journal article supplement (PMC7042713; doi:10.1016/j.cell.2020.01.011), 2020-02-06
Supplement: mmc1.pdf [file mmc1.pdf]

**Cell, Volume 180**

**Supplemental Information**

**DIX Domain Polymerization Drives Assembly  
of Plant Cell Polarity Complexes**

**Maritza van Dop, Marc Fiedler, Sumanth Mutte, Jeroen de Keijzer, Lisa Olijslager, Catherine Albrecht, Che-Yang Liao, Marcel E. Janson, Mariann Bienz, and Dolf Weijers**

**Table S1 (Related to Fig. 1): SOSEKI gene distribution in plant genomes**

| Lineage     | Class  | Species                         | Family        | GeneID                                                                                                                                                    |
|-------------|--------|---------------------------------|---------------|-----------------------------------------------------------------------------------------------------------------------------------------------------------|
| Angiosperms | Rosids | <i>Vigna radiata</i>            | Fabaceae      | vra_01g10340,vra_02g05090,vra_02g06290,vra_04g03140,vra_08g22610                                                                                          |
| Angiosperms | Rosids | <i>Vigna angularis</i>          | Fabaceae      | van_0010ss02280.1,van_0022ss04200.1,van_0032ss01130.1,van_0032ss01130.2,van_0032ss01130.3,van_10g03360.1                                                  |
| Angiosperms | Rosids | <i>Phaseolus vulgaris</i>       | Fabaceae      | pvu_002G261900,pvu_005G042900,pvu_005G069000,pvu_005G130600,pvu_011G066900                                                                                |
| Angiosperms | Rosids | <i>Glycine max</i>              | Fabaceae      | gma_05G180800,gma_08G138500,gma_08G159000,gma_11G142600,gma_12G065900,gma_12G178300,gma_13G322200,gma_15G267400                                           |
| Angiosperms | Rosids | <i>Cajanus cajan</i>            | Fabaceae      | cca_14036,cca_21153,cca_21591,cca_25562                                                                                                                   |
| Angiosperms | Rosids | <i>Trifolium pratense</i>       | Fabaceae      | tpr_gene1012,tpr_gene16144,tpr_gene21027,tpr_gene2242,tpr_gene28209                                                                                       |
| Angiosperms | Rosids | <i>Medicago truncatula</i>      | Fabaceae      | mtr_2g062310,mtr_2g084275,mtr_4g057330,mtr_4g063130,mtr_8g091300                                                                                          |
| Angiosperms | Rosids | <i>Arachis duranensis</i>       | Fabaceae      | adu_Aradu.4PC58,adu_Aradu.AEQ3S,adu_Aradu.CA7FP,adu_Aradu.RWZ7G                                                                                           |
| Angiosperms | Rosids | <i>Lotus japonicus</i>          | Fabaceae      | lja_0g3v0262389.1,lja,lja_3g3v1113340.1,lja,lja_3g3v3033280.1,lja,lja_3g3v3165170.1,lja,lja_4g3v2819920.1,lja                                             |
| Angiosperms | Rosids | <i>Lupinus angustifolius</i>    | Fabaceae      | Lang109325917,Lang109326960,Lang109334206,Lang109347963,Lang109351607,Lang109353497,Lang109353536                                                         |
| Angiosperms | Rosids | <i>Cicer arietinum</i>          | Fabaceae      | car_00770.1,car_02966.1,car_11031.1,car_18456.1,car_24422.1 scaffold01402:27950-31384 plus                                                                |
| Angiosperms | Rosids | <i>Prunus mume</i>              | Rosaceae      | pmu_000811,pmu_001152,pmu_002067,pmu_016412,pmu_030310                                                                                                    |
| Angiosperms | Rosids | <i>Prunus persica</i>           | Rosaceae      | ppe_2G001400,ppe_6G084700,ppe_6G112400,ppe_6G181200                                                                                                       |
| Angiosperms | Rosids | <i>Pyrus x bretschneideri</i>   | Rosaceae      | pbr_022560.1,pbr_023770.1,pbr_026434.1,pbr_028979.1,pbr_030366.1,pbr_033989.1,pbr_039290.1                                                                |
| Angiosperms | Rosids | <i>Malus domestica</i>          | Rosaceae      | mdo_0000164133,mdo_0000191557,mdo_0000220817,mdo_0000248575,mdo_0000255456,mdo_0000300897,mdo_0000839354                                                  |
| Angiosperms | Rosids | <i>Rubus occidentalis</i>       | Rosaceae      | roe_G02053,roe_G02523,roe_G10699,roe_G21226                                                                                                               |
| Angiosperms | Rosids | <i>Fragaria vesca</i>           | Rosaceae      | fve_13969,fve_16367,fve_24610                                                                                                                             |
| Angiosperms | Rosids | <i>Morus notabilis</i>          | Moraceae      | Mnot21394126,Mnot21399641,Mnot21403527,Mnot21408099                                                                                                       |
| Angiosperms | Rosids | <i>Ziziphus jujuba</i>          | Rhamnaceae    | Zjuj107411067,Zjuj107411431,Zjuj107413514,Zjuj107425435                                                                                                   |
| Angiosperms | Rosids | <i>Humulus lupulus</i>          | Cannabaceae   | hlu_G011207,hlu_G020145,hlu_G029486,hlu_G034927                                                                                                           |
| Angiosperms | Rosids | <i>Jatropha curcas</i>          | Euphorbiaceae | jcu_4S01551.20jcu,jcu_4S01614.10jcu,jcu_4S02133.40jcu,jcu_4S04391.30jcu,jcu_4S06495.20jcu                                                                 |
| Angiosperms | Rosids | <i>Manihot esculenta</i>        | Euphorbiaceae | mes_04G013400,mes_04G030500,mes_10G153300,mes_11G134200,mes_11G152200,mes_12G137400                                                                       |
| Angiosperms | Rosids | <i>Ricinus communis</i>         | Euphorbiaceae | rco_28180.t000021,rco_28653.t000004,rco_29589.t000033,rco_29713.t000010,rco_30226.t000064                                                                 |
| Angiosperms | Rosids | <i>Linum usitatissimum</i>      | Linaceae      | lus_10003921,lus_10004943,lus_10005442,lus_10016150,lus_10021417,lus_10037468,lus_10040860                                                                |
| Angiosperms | Rosids | <i>Populus trichocarpa</i>      | Salicaceae    | ptr_001G231700,ptr_001G235700,ptr_004G216200,ptr_005G078300,ptr_009G005800,ptr_009G024900,ptr_009G027500                                                  |
| Angiosperms | Rosids | <i>Cucumis sativus</i>          | Cucurbitaceae | csa_049870,csa_165470,csa_213490,csa_385720                                                                                                               |
| Angiosperms | Rosids | <i>Cucumis melo</i>             | Cucurbitaceae | cme_3C020702,cme_3C023839,cme_3C026950                                                                                                                    |
| Angiosperms | Rosids | <i>Citrullus lanatus</i>        | Cucurbitaceae | cla_002398,cla_004028,cla_008280,cla_008702,cla_015291                                                                                                    |
| Angiosperms | Rosids | <i>Castanea mollissima</i>      | Fagaceae      | cmo_s00909_0.44_1,cmo_s02976_0.20_1,cmo_s04551_0.14_1,cmo_s05226_0.14_1,cmo_s06746_0.13_1                                                                 |
| Angiosperms | Rosids | <i>Juglans regia</i>            | Juglandaceae  | jre_00004214,jre_00009636,jre_00010373,jre_00011105,jre_00015505                                                                                          |
| Angiosperms | Rosids | <i>Betula pendula</i>           | Betulaceae    | Bpen1260976288,Bpen1260982609,Bpen1261012322,Bpen1261014530,Bpen1261028988                                                                                |
| Angiosperms | Rosids | <i>Capsella grandiflora</i>     | Brassicaceae  | cgr_10637s0002,cgr_1085s0044,cgr_12562s0001,cgr_1317s0037,cgr_1671s0185                                                                                   |
| Angiosperms | Rosids | <i>Capsella rubella</i>         | Brassicaceae  | cru_10001062,cru_10011656,cru_10017467,cru_10023344,cru_10026455                                                                                          |
| Angiosperms | Rosids | <i>Arabidopsis lyrata</i>       | Brassicaceae  | AlyrAL1G15460,AlyrAL4G22000,AlyrAL5G24860,AlyrAL6G20610,AlyrAL6G20640,AlyrAL8G36340                                                                       |
| Angiosperms | Rosids | <i>Arabidopsis thaliana</i>     | Brassicaceae  | ath_AT2G28150,ath_AT3G46110,ath_AT5G10150,ath_AT5G59790                                                                                                   |
| Angiosperms | Rosids | <i>Camelina sativa</i>          | Brassicaceae  | Csat104700722,Csat104708090,Csat104737118,Csat104739095,Csat104762094,Csat104763394,Csat104769214,Csat104780427,Csat104786906,Csat104790845               |
| Angiosperms | Rosids | <i>Brassica oleracea</i>        | Brassicaceae  | bol_Bo2g009720,bol_Bo2g025400,bol_Bo4g071860,bol_Bo5g006810,bol_Bo8g115040,bol_Bo9g140780                                                                 |
| Angiosperms | Rosids | <i>Brassica rapa</i>            | Brassicaceae  | bra_B00345,bra_B01070,bra_G01352,bra_I05446,bra_J00384,bra_J01348                                                                                         |
| Angiosperms | Rosids | <i>Brassica napus</i>           | Brassicaceae  | bnp_BnaA02g00380D,bnp_BnaA02g06840D,bnp_BnaA02g06850D,bnp_BnaA07g13680D,bnp_BnaA09g50300D,bnp_BnaC02g00480D,bnp_BnaC04g16130D,bnp_BnaC05g03700D           |
| Angiosperms | Rosids | <i>Raphanus raphanistrum</i>    | Brassicaceae  | rra_10931_p1,rra_1916_p3,rra_1937_p5,rra_2002_p1,rra_20660_p2,rra_23335_p1                                                                                |
| Angiosperms | Rosids | <i>Thellungiella halophila</i>  | Brassicaceae  | thh_10009387m,thh_10013653m,thh_10013690m,thh_10013702m,thh_10016498m                                                                                     |
| Angiosperms | Rosids | <i>Thellungiella salsuginea</i> | Brassicaceae  | tsa_Ts1g04510,tsa_Ts4g11810,tsa_Ts6g23890,tsa_Ts6g36370                                                                                                   |
| Angiosperms | Rosids | <i>Leavenworthia alabamica</i>  | Brassicaceae  | lal_scaffold1335_14lal,lal_scaffold2189_9lal,lal_scaffold3078_5lal,lal_scaffold432_5lal,lal_scaffold450_51lal,lal_scaffold493_20lal,lal_scaffold620_45lal |
| Angiosperms | Rosids | <i>Aethionema arabicum</i>      | Brassicaceae  | aar_AA16G00068,aar_AA32G00886,aar_AA44G00278,aar_AA4G00026,aar_AA97G00030                                                                                 |
| Angiosperms | Rosids | <i>Schrenkiella parvula</i>     | Brassicaceae  | spar_c0001_00391,spar_c0002_00815,spar_c0002_01885,spar_c0004_01864,spar_c0117_00010                                                                      |
| Angiosperms | Rosids | <i>Boechera stricta</i>         | Brassicaceae  | Bostr.13175s0086,Bostr.18473s0332,Bostr.25219s0413,Bostr.26833s0258,Bostr.27991s0113                                                                      |
| Angiosperms | Rosids | <i>Arabis alpina</i>            | Brassicaceae  | Alp318770,Alp356480,Alp504030,Alp79410,Alp821710                                                                                                          |
| Angiosperms | Rosids | <i>Sisymbrium irio</i>          | Brassicaceae  | sir_scaffold1277_13sir,sir_scaffold1460_2sir,sir_scaffold2746_51sir,sir_scaffold418_8sir                                                                  |
| Angiosperms | Rosids | <i>Cleome gynandra</i>          | Cleomaceae    | cgy_12555,cgy_12664,cgy_13985,cgy_14990,cgy_15372                                                                                                         |
| Angiosperms | Rosids | <i>Tarenaya hassleriana</i>     | Cleomaceae    | tha_Th2v07633,tha_Th2v13633,tha_Th2v15660,tha_Th2v15972,tha_Th2v18805,tha_Th2v21279                                                                       |

|             |                |                                   |                  |                                                                                                                                                                                                    |
|-------------|----------------|-----------------------------------|------------------|----------------------------------------------------------------------------------------------------------------------------------------------------------------------------------------------------|
| Angiosperms | Rosids         | <i>Carica papaya</i>              | Cariaceae        | cpa_1.354cpa.cpa_190.33cpa.cpa_476.3cpa                                                                                                                                                            |
| Angiosperms | Rosids         | <i>Gossypium raimondii</i>        | Malvaceae        | gra_001G108000.gra_003G136300.gra_003G146100.gra_004G232000.gra_07G241300.gra_009G101600                                                                                                           |
| Angiosperms | Rosids         | <i>Theobroma cacao</i>            | Malvaceae        | tca_001159.tca_036521.tca_041902.tca_042162.tca_042839                                                                                                                                             |
| Angiosperms | Rosids         | <i>Eucalyptus grandis</i>         | Myrtaceae        | egr_B02400.egr_G03434.egr_100418.egr_J00387                                                                                                                                                        |
| Angiosperms | Rosids         | <i>Citrus sinensis</i>            | Rutaceae         | csi_1g009456.csi_1g015170.csi_1g015443.csi_1g048680                                                                                                                                                |
| Angiosperms | Rosids         | <i>Vitis vinifera</i>             | Vitaceae         | vvi_01005997001.vvi_01006373001.vvi_01016603001.vvi_01025033001.vvi_01031469001                                                                                                                    |
| Angiosperms | Super-Asterids | <i>Solanum pennellii</i>          | Solanaceae       | spe_01g033180.1.spe_04g024600.1.spe_06g032080.1.spe_11g026130.1.spe_11g026130.2.spe_11g030760.1                                                                                                    |
| Angiosperms | Super-Asterids | <i>Solanum lycopersicum</i>       | Solanaceae       | sly_01g081630.2sly.sly_04g010330.2sly.sly_06g030470.2sly.sly_06g075690.2sly.sly_11g066380.1sly.sly_11g073110.1sly                                                                                  |
| Angiosperms | Super-Asterids | <i>Solanum tuberosum</i>          | Solanaceae       | stu_00000416.stu_00002267.stu_00015560.stu_00020631.stu_00030309.stu_00031117                                                                                                                      |
| Angiosperms | Super-Asterids | <i>Solanum melongena</i>          | Solanaceae       | sme_00019.1.g00004.1.sme_00133.1.g00016.1.sme_00896.1.g00009.1.sme_03876.1.g00006.1.sme_06578.1.g00002.1                                                                                           |
| Angiosperms | Super-Asterids | <i>Capsicum annuum</i>            | Solanaceae       | can_Capana01g003241.can_Capana06g000459.can_Capana11g000172.can_Capana11g000756.can_Capana12g001628                                                                                                |
| Angiosperms | Super-Asterids | <i>Nicotiana benthamiana</i>      | Solanaceae       | nbe_NbC25559599g0003.nbe_NbS00005205g0002.nbe_NbS00012706g0013.nbe_NbS00018660g0016.nbe_NbS00039215g0008.nbe_NbS00050054g0014                                                                      |
| Angiosperms | Super-Asterids | <i>Nicotiana tomentosiformis</i>  | Solanaceae       | Ntom104098369.Ntom104102300.Ntom104106065.Ntom104111073.Ntom104111968.Ntom104112606                                                                                                                |
| Angiosperms | Super-Asterids | <i>Nicotiana attenuata</i>        | Solanaceae       | Nattg00112.Nattg02993.Nattg14428.Nattg21505.Nattg35714.Nattg37750                                                                                                                                  |
| Angiosperms | Super-Asterids | <i>Nicotiana sylvestris</i>       | Solanaceae       | Nsylv104211961.Nsylv104212342.Nsylv104218199.Nsylv104231073.Nsylv104239700.Nsylv104243301                                                                                                          |
| Angiosperms | Super-Asterids | <i>Petunia axillaris</i>          | Solanaceae       | pax_00365g00021.pax_00402g00927.pax_00411g00116.pax_00422g00079.pax_00983g00415.pax_00986g00225                                                                                                    |
| Angiosperms | Super-Asterids | <i>Ipomoea nil</i>                | Convolvulaceae   | Inil109148068.Inil109172632.Inil109178484.Inil109185924.Inil109193029                                                                                                                              |
| Angiosperms | Super-Asterids | <i>Utricularia gibba</i>          | Lentibulariaceae | ugi_Scf00042.g4844ugi.ugi_Scf00082.g7495ugi.ugi_Scf00117.g9308ugi.ugi_Scf00161.g11077ugi.ugi_Scf00197.g12222ugi.ugi_Scf01019.g23292ugi                                                             |
| Angiosperms | Super-Asterids | <i>Sesamum indicum</i>            | Pedaliaceae      | sin_1004336.sin_1005176.sin_1008257.sin_1010486.sin_1024084.sin_1024192                                                                                                                            |
| Angiosperms | Super-Asterids | <i>Mimulus guttatus</i>           | Phrymaceae       | mgu_L00105.mgu_N01652.mgu_N02545.mgu_N02662                                                                                                                                                        |
| Angiosperms | Super-Asterids | <i>Coffea canephora</i>           | Rubiaceae        | coc_01_g10330.coc_01_g12290.coc_02_g08340.coc_02_g26760                                                                                                                                            |
| Angiosperms | Super-Asterids | <i>Lactuca sativa</i>             | Asteraceae       | Lsat1_64580.Lsat1_87440.Lsat5_167421.Lsat5_42720.Lsat6_43200.Lsat9_22261                                                                                                                           |
| Angiosperms | Super-Asterids | <i>Helianthus annuus</i>          | Asteraceae       | hel_Ha1_00043918.hel_Ha2_00033351.hel_Ha3_00014838.hel_Ha15_00040114.hel_Ha2_00028128.hel_Ha4_00025522.hel_Ha8_00042287                                                                            |
| Angiosperms | Super-Asterids | <i>Daucus carota</i>              | Apiaceae         | dca_006003.dca_011505.dca_015507.dca_018884.dca_024996.dca_029581                                                                                                                                  |
| Angiosperms | Super-Asterids | <i>Actinidia chinensis</i>        | Actinidiaceae    | ach_Achn067311.ach_Achn107861.ach_Achn171521.ach_Achn258271.ach_Achn295901.ach_Achn378401                                                                                                          |
| Angiosperms | Super-Asterids | <i>Chenopodium quinoa</i>         | Amaranthaceae    | CquiAUR62001837.CquiAUR62002030.CquiAUR62003768.CquiAUR62009625.CquiAUR62014960.CquiAUR62029174                                                                                                    |
| Angiosperms | Super-Asterids | <i>Spinacia oleracea</i>          | Amaranthaceae    | sol_142250_rhzn.tl.sol_180050_gfew.tl                                                                                                                                                              |
| Angiosperms | Super-Asterids | <i>Beta vulgaris</i>              | Amaranthaceae    | bvu_Bv6_135470_ofdn.bvu_Bv7_174520_gnot.bvu_Bv9_205850_sofh                                                                                                                                        |
| Angiosperms | Super-Asterids | <i>Amaranthus hypochondriacus</i> | Amaranthaceae    | AhypAH000219.AhypAH005948.AhypAH013139.AhypAH022517                                                                                                                                                |
| Angiosperms | Eudicots       | <i>Nelumbo nucifera</i>           | Nelumbonaceae    | nnu_03010.nnu_12336.nnu_16954.nnu_20223.nnu_22447.nnu_23257.nnu_23590                                                                                                                              |
| Angiosperms | Monocots       | <i>Triticum urartu</i>            | Poaceae          | tur_TRIUR3_07098.tur_TRIUR3_24591.tur_TRIUR3_26826.tur_TRIUR3_32429                                                                                                                                |
| Angiosperms | Monocots       | <i>Triticum aestivum</i>          | Poaceae          | tae_Traes_2BS_C2A6130B11.tae_TRAES3BF06000010CFD.tae_TRAES3BF065400020CFD.tae_TRAES3BF127400020CFD.tae_Traes_4AL_9E250501B.tae_Traes_4AS_048C1EC18.tae_Traes_4DL_62077A769.tae_Traes_4DS_4326E7827 |
| Angiosperms | Monocots       | <i>Aegilops tauschii</i>          | Poaceae          | ata_EMT02390.ata_EMT08241.ata_EMT10074.ata_EMT27042.ath_AT1G05577                                                                                                                                  |
| Angiosperms | Monocots       | <i>Hordeum vulgare</i>            | Poaceae          | HORVU3Hr1G076430.HORVU3Hr1G086700.HORVU3Hr1G116730.HORVU4Hr1G005250.HORVU7Hr1G045060                                                                                                               |
| Angiosperms | Monocots       | <i>Brachypodium distachyon</i>    | Poaceae          | bdi_Bradi1g12010.bdi_Bradi1g71710.bdi_Bradi2g51680.bdi_Bradi2g54510.bdi_Bradi2g62490.bdi_Bradi3g43040                                                                                              |
| Angiosperms | Monocots       | <i>Oryza glaberrima</i>           | Poaceae          | ogl_01G0270100.ogl_01G0304800.ogl_03G0064900.ogl_03G0277600.ogl_04G0281500.ogl_08G0191100                                                                                                          |
| Angiosperms | Monocots       | <i>Oryza sativa</i>               | Poaceae          | osa_LOC_Os01g57020osa.osa_LOC_Os01g62200osa.osa_LOC_Os03g0920osa.osa_LOC_Os03g48600osa.osa_LOC_Os08g44760osa                                                                                       |
| Angiosperms | Monocots       | <i>Oryza rufipogon</i>            | Poaceae          | oru_ORUF101G36150.1oru.oru_ORUF103G06610.1oru.oru_ORUF103G31600.1oru.oru_ORUF108G26200.1oru.oru_ORUF109G15590.1oru                                                                                 |
| Angiosperms | Monocots       | <i>leersia perrieri</i>           | Poaceae          | lpe_01G28490.1lpe.lpe_01G31510.1lpe.lpe_03G06010.1lpe.lpe_03G25060.1lpe.lpe_08G20420.1lpe                                                                                                          |
| Angiosperms | Monocots       | <i>Phyllostachys heterocycla</i>  | Poaceae          | phe_PH01000129G0220.phe_PH01000374G0210.phe_PH01000788G0630.phe_PH01001206G0640.phe_PH01001642G0360.phe_PH01002026G0070                                                                            |
| Angiosperms | Monocots       | <i>Zea mays</i>                   | Poaceae          | zma_GRMZM2G070442.zma_GRMZM2G086123.zma_GRMZM2G112836.zma_GRMZM2G136710.zma_GRMZM2G177052.zma_GRMZM5G871592                                                                                        |
| Angiosperms | Monocots       | <i>Zea mays -V4</i>               | Poaceae          | Zmay100272305_1.Zmay100272305_2.Zmay100272305_3.Zmay100276675_1.Zmay100276675_2.Zmay103636515_1.Zmay103636515_2.Zmay103636515_3.Zmay103643835.Zmay103651032                                        |
| Angiosperms | Monocots       | <i>Sorghum bicolor</i>            | Poaceae          | sbi_001G130700.sbi_001G473500.sbi_003G315600.sbi_003G349800.sbi_007G166800                                                                                                                         |
| Angiosperms | Monocots       | <i>Setaria italica</i>            | Poaceae          | sit_5G339100.sit_5G375200.sit_6G251500.sit_9G132200.sit_9G509000                                                                                                                                   |
| Angiosperms | Monocots       | <i>Oropetium thomaeum</i>         | Poaceae          | oth_00349.oth_10088.oth_12702.oth_14464.oth_18829                                                                                                                                                  |
| Angiosperms | Monocots       | <i>Ananas comosus</i>             | Bromeliaceae     | aco_004096.aco_009327.aco_010974.aco_020392.aco_023608                                                                                                                                             |
| Angiosperms | Monocots       | <i>Elaeis guineensis</i>          | Arecaceae        | egu_sc00069_439.egu_sc00099_250.egu_sc00134_228.egu_sc00140_191                                                                                                                                    |
| Angiosperms | Monocots       | <i>Phoenix dactylifera</i>        | Arecaceae        | Pdac103696515.Pdac103705503.Pdac103705998.Pdac103708106.Pdac103717242.Pdac103719979                                                                                                                |
| Angiosperms | Monocots       | <i>Musa acuminata</i>             | Musaceae         | mac_01_02060.1mac.mac_02_23990.1mac.mac_05_14790.1mac.mac_05_30710.1mac.mac_05_30900.1mac.mac_09_29020.1mac.mac_10_19000.1mac.mac_11_02160.1mac.mac_11_22820.1mac                                  |

|             |          |                                  |               |                                                                                                                                  |
|-------------|----------|----------------------------------|---------------|----------------------------------------------------------------------------------------------------------------------------------|
| Angiosperms | Monocots | <i>Dendrobium catenatum</i>      | Orchidaceae   | Dcat110091826,Dcat110099896,Dcat110099918,Dcat110103181,Dcat110105435,Dcat11011944,Dcat110115073                                 |
| Angiosperms | Monocots | <i>Phalaenopsis equestris</i>    | Orchidaceae   | peq_10763,peq_14560,peq_17260,peq_19806,peq_21055,peq_40778                                                                      |
| Angiosperms | Monocots | <i>Asparagus officinalis</i>     | Asparagaceae  | Aoff109822809,Aoff109832142,Aoff109834999,Aoff109836511,Aoff109843594                                                            |
| Angiosperms | Monocots | <i>Xerophyta viscosa</i>         | Velloziaceae  | Xvis03_200935,Xvis03_201836,Xvis03_202066,Xvis03_213866,Xvis03_214169,Xvis03_218847                                              |
| Angiosperms | Monocots | <i>Spirodela polyrhiza</i>       | Araceae       | spo_17G0045300,spo_1G0018300,spo_23G0024700,spo_4G0012900                                                                        |
| Angiosperms | Monocots | <i>Lemna minor</i>               | Lemnaceae     | lmi_001103,lmi_017315                                                                                                            |
| Angiosperms | Monocots | <i>Zostera marina</i>            | Zosteraceae   | zom_15g01360,zom_241g00190,zom_2g02660,zom_303g00130,zom_43g00720                                                                |
| Angiosperms |          | <i>Amborella trichopoda</i>      | Amborellaceae | atr_scaffold00068.91atr,atr_scaffold00089.37atr,atr_scaffold00178.7atr                                                           |
| Gymnosperms |          | <i>Gnetum montanum</i>           | Gnetaceae     | GMO00027921                                                                                                                      |
| Gymnosperms |          | <i>Picea abies</i>               | Pinaceae      | PAB00014665, PAB00038888, PAB00040409                                                                                            |
| Gymnosperms |          | <i>Picea glauca</i>              | Pinaceae      | PGL00019156, PGL00019193                                                                                                         |
| Gymnosperms |          | <i>Pseudotsuga menziesii</i>     | Pinaceae      | PME00003895, PME00004197, PME00113392                                                                                            |
| Gymnosperms |          | <i>Pinus pinaster</i>            | Pinaceae      | PPi00000548, PPi00003747, PPi00007365, PPi00014188, PPi00031688                                                                  |
| Gymnosperms |          | <i>Pinus sylvestris</i>          | Pinaceae      | PSY00017750, PSY00018635, PSY00018636                                                                                            |
| Gymnosperms |          | <i>Populus trichocarpa</i>       | Salicaceae    | PT01G23170, PT01G23230, PT01G23570, PT04G21620, PT05G07830, PT08G05100, PT09G00580, PT09G02490, PT09G02750, PT10G20960           |
| Gymnosperms |          | <i>Pinus taeda</i>               | Pinaceae      | PTA00006616, PTA00017601, PTA00021624, PTA00027577, PTA00039081, PTA00043528, PTA00058226, PTA00063752, PTA00066655, PTA00081843 |
| Gymnosperms |          | <i>Taxus baccata</i>             | Taxaceae      | TBA00021570, TBA00022943, TBA00025016                                                                                            |
| Lycophyte   |          | <i>Selaginella mollendorffii</i> |               | Sm412562, Sm439304, Sm409423, Sm449230                                                                                           |

**Table S2 (Related to Fig. 4): Data collection and refinement statistics**

| <b>Data Collection</b>                                  | <b>AtSOK1 DIX (6RSN)</b> |
|---------------------------------------------------------|--------------------------|
| Space Group                                             | P 61                     |
| Cell dimensions                                         |                          |
| <i>a</i> , <i>b</i> , <i>c</i> (Å)                      | 47.66, 47.66, 67.97      |
| $\alpha$ , $\beta$ , $\gamma$ (°)                       | 90.0, 90.0, 120.0        |
| Resolution (Å)                                          | 35.28 - 1.70             |
| *Rmerge (%)                                             | 7.5 (65.9)               |
| Mean I/ $\sigma$ (I)                                    | 33.91                    |
| Completeness (%)                                        | 99.5                     |
| Multiplicity                                            | 20.0                     |
| Complexes in A.U.                                       | 1                        |
| <b>Refinement</b>                                       |                          |
| Resolution (Å)                                          | 35.28 - 1.70             |
| No. Reflections                                         | 192374                   |
| <i>R</i> <sub>work</sub> / <i>R</i> <sub>free</sub> (%) | 28.5 / 21.4              |
| No. Atoms                                               | 808                      |
| Wilson B-factor (Å <sup>2</sup> )                       | 25.5                     |
| Anisotropy                                              | 0.154                    |
| Average B, all atoms (Å <sup>2</sup> )                  | 38.0                     |
| <i>B</i> -factors                                       |                          |
| Protein                                                 | 27.6                     |
| Ligands                                                 | 72.8                     |
| Water                                                   | 40.9                     |
| R.m.s. deviations                                       |                          |
| Bond length (Å)                                         | 0.014                    |
| Bond angle (°)                                          | 2.22                     |

\* Highest resolution shell (in Å) shown in parenthesis.

**Table S3 (Related to Fig. 7): DIX domain proteins used in this study**

| <b>GeneName</b> | <b>Species</b>         | <b>UniprotID/GeneID</b> |
|-----------------|------------------------|-------------------------|
| DVL1            | <i>M. musculus</i>     | P51141                  |
| DVL2            | <i>M. musculus</i>     | Q60838                  |
| DVL3            | <i>M. musculus</i>     | Q61062                  |
| DVL1            | <i>H. sapiens</i>      | O14640                  |
| DVL2            | <i>H. sapiens</i>      | O14641                  |
| DVL3            | <i>H. sapiens</i>      | Q92997                  |
| DVL2            | <i>X. laevis</i>       | P51142                  |
| DVL3            | <i>X. laevis</i>       | Q6DKE2                  |
| DSH             | <i>D. melanogaster</i> | P51140                  |
| DSH-MIG5        | <i>C. elegans</i>      | Q22227                  |
| DSH             | <i>D. rerio</i>        | F1QM97                  |
| AXIN1           | <i>M. musculus</i>     | O35625                  |
| AXIN2           | <i>M. musculus</i>     | O88566                  |
| AXIN1           | <i>H. sapiens</i>      | O15169                  |
| AXIN2           | <i>H. sapiens</i>      | Q9Y2T1                  |
| AXIN1           | <i>D. rerio</i>        | P57094                  |
| AXIN1           | <i>G. domesticus</i>   | O42400                  |
| AXIN1           | <i>X. laevis</i>       | Q9YGY0                  |
| AXN             | <i>D. melanogaster</i> | Q9V407                  |
| AXN-PRY1        | <i>C. elegans</i>      | O62090                  |
| DIXC1           | <i>M. musculus</i>     | Q80Y83                  |
| DIXC1           | <i>H. sapiens</i>      | Q155Q3                  |
| DIX1A           | <i>D. rerio</i>        | Q804T6                  |
| MpSOK           | <i>M. polymorpha</i>   | Mapoly0032s0007         |
| PpSOK1          | <i>P. patens</i>       | Pp3c14_23220V3.1        |
| PpSOK2          | <i>P. patens</i>       | Pps3c2_20380V3.1        |
| PpSOK3          | <i>P. patens</i>       | Pp3c17_23930V3.1        |
| PpSOK4          | <i>P. patens</i>       | Pp3c18_11140V3.1        |
| PpSOK5          | <i>P. patens</i>       | Pp3c1_41700V3.1         |
| PpSOK6          | <i>P. patens</i>       | Pp3c19_18440V3.1        |
| PpSOK7          | <i>P. patens</i>       | Pp3c22_12010V3.1        |
| PpSOK8          | <i>P. patens</i>       | Pp3c7_12520V3.1         |
| PpSOK9          | <i>P. patens</i>       | Pp3c1_15970V3.1         |
| AtSOK1          | <i>A. thaliana</i>     | AT1G05577               |
| AtSOK2          | <i>A. thaliana</i>     | AT5G10150               |
| AtSOK3          | <i>A. thaliana</i>     | AT2G28150               |
| AtSOK4          | <i>A. thaliana</i>     | AT3G46110               |
| AtSOK5          | <i>A. thaliana</i>     | AT5G59790               |
|                 | <i>P. falciparum</i>   | XP_008892787            |
|                 | <i>P. tetraurelia</i>  | A0DFT1                  |
|                 | <i>C. parvum</i>       | XP_626730               |
|                 | <i>P. falciparum</i>   | XP_001348377            |
|                 | <i>B. hominis</i>      | XP_012898418            |
|                 | <i>E. siliculosus</i>  | CBN75002                |

**Table S4 (Related to STAR Methods): Oligonucleotides used in this study**

| <b>RPS5A-SOK1(5WT/mutant)-YFP</b>                                                             |                                             |
|-----------------------------------------------------------------------------------------------|---------------------------------------------|
| SOK1 CDS LIC F                                                                                | TAGTTGGAATAGGTTTCATGGAAAGTAATGGTGGAGG       |
| YFP LIC R                                                                                     | AGTATGGAGTTGGGTCTTACTTGTACAGCTCGTCC         |
| SOK1 C233A F                                                                                  | CGGAACTTGATGAAGGCTGGTGGTTGGACACA            |
| SOK1 C233A R                                                                                  | TGTGTCCAAACCACCAGCCTTCATCAAGTTCCG           |
| SOK1 C233A/G234A F                                                                            | CGGAACTTGATGAAGGCTGCTGGTTGGACACAAAC         |
| SOK1 C233A/G234A R                                                                            | GTTTGTGTCCAAACCAGCAGCCTTCATCAAGTTCCG        |
| SOK1 C307A/C310A F                                                                            | TCCATGGCTCCATTAGCCTCGCAAGCTGGGAAGTTGTCAAA   |
| SOK1 C307A/C310A R                                                                            | TTTGAACAACCTCCCAGCTTGGCAGGCTAATGGAGCCATGGA  |
| SOK1 D78R F                                                                                   | GAATGGTTATGTATGGCAAAGATTATTGGACGATGATCTTAT  |
| SOK1 D78R R                                                                                   | ATAAGATCATCGTCCAATAATCTTTGCCATACATAACCATTCC |
| SOK1 D78A F                                                                                   | CAAGCCTTATTGGACGATGATC                      |
| SOK1 D78A R                                                                                   | CAATAAGGCTTGCCATACATAACC                    |
| SOK1 H29D F                                                                                   | CGGGTCACGTTGACCATCTGATCTCTTGCCTGTTTCATCATCT |
| SOK1 H29D R                                                                                   | AGATGATGAACACGCAAGAGATCAGGATGGTCAACGTGACCCG |
| Dvl DIX LIC F                                                                                 | TAGTTGGAATAGGTTTCATGGCGGGTAGCAGCACTGG       |
| Dvl DIX SOK1 FW                                                                               | CTCCAGTCCATGAGCCTCGGGCTTGGGTGACAAGAAACGG    |
| Dvl DIX SOK1 RV                                                                               | CCGTTTCTTGTACCCAAGCCCGAGGCTCATGGACTGGAG     |
| SOK5 CDS LIC F                                                                                | TAGTTGGAATAGGTTTCATGAGTTCAAGAGTGTTTCAGAGC   |
| SOK5 C303A F                                                                                  | GTTAATGCAGCTGATATCGGCTGGTACGATGTCGTTTAAAG   |
| SOK5 C303A R                                                                                  | CTTTAAACGACATCGTACCAGCCGATATCAGCTGCATTAAC   |
| SOK5 E356Q/E359Q F                                                                            | GGAAGGGTACAATTGCAAGATAAGCAGTATTTTAGCGGCAG   |
| SOK5 E356Q/E359Q R                                                                            | CTGCCGCTAAAATACTGCTTATCTTGCAATTGTACCCTTCC   |
| <b>ANGUSTIFOLIA-tdTomato</b>                                                                  |                                             |
| Angustifolia F                                                                                | TAGTTGGAATGGGTCTACAACCAAATCGTACCACA         |
| Angustifolia R                                                                                | TTATGGAGTTGGGTCCATCGATCCAACGTGTGATAC        |
| <b>PpSOK-mCitrine fusions (LF, left flank; RF, right flank; Restriction sites underlined)</b> |                                             |
| PpSOK1-LF-F-KpnI                                                                              | GG <u>GGT</u> ACCCGCAGAAGCAGAAGTTGACACC     |
| PpSOK1-LF-R-XhoI                                                                              | CCG <u>CTCGAGG</u> CATCGGACCACATGCGG        |
| PpSOK1-RF-F-SmaI                                                                              | <u>GGG</u> ATTCGTTATTGTGCGGCTGG             |
| PpSOK1-RF-R-NotI                                                                              | AGA <u>AGCGGCCG</u> CTTGGTCTGCTCCCTCCATCG   |
| PpSOK2-LF-F-ApaI                                                                              | ACGC <u>GGGCC</u> ACCAGAACAAGTCACAGGGAGG    |
| PpSOK2-LF-R-ClaI                                                                              | CC <u>ATCGATT</u> GCAGTATCAAATCCTTTGGAGATTG |
| PpSOK2-RF-F-SmaI                                                                              | <u>GGG</u> ATGCTCGTAAGTGCCTCATTCAAG         |
| PpSOK2-RF-R-NotI                                                                              | AGA <u>AGCGGCCG</u> CATGCAACATGGGCGGATACAG  |
| PpSOK2-LF-F-ApaI                                                                              | ACGC <u>GGGCC</u> ATTGCATTCTCTCCCTTGTG      |
| PpSOK3-LF-R-HindIII                                                                           | CC <u>CAAGCTT</u> CGAAGCTCGAGATCGGACGACG    |
| PpSOK3-RF-F-SmaI                                                                              | <u>GGG</u> CTTTTCTGACTGCCGATTCATGG          |

|                                                                                              |                                        |
|----------------------------------------------------------------------------------------------|----------------------------------------|
| PpSOK3-RF-R-NotI                                                                             | AGAAGCGGCCGCTACATTCTTTCTGCCACGTCC      |
| PpSOK4-LF-F-KpnI                                                                             | GGGGTACCCTGCACACAATCTCCCACTCTC         |
| PpSOK4-LF-R-XhoI                                                                             | CCGCTCGAGTTTTTTGATACTCTGATCCTGTTTTAAGG |
| PpSOK4-RF-F-SmaI                                                                             | GGGCCTAGGTATTTGAATTCTGAAGTATCC         |
| PpSOK4-RF-R-NotI                                                                             | AGAAGCGGCCGCGGTGTCGATGCCTCTTTCGATTG    |
| <b>PpSOK genotyping primers (before: before insertion site, after: after insertion site)</b> |                                        |
| Physco geno mCIT RV                                                                          | GCCGGACACGCTGAACTGTG                   |
| Physco T35S F                                                                                | TGCTAAGGCAGGGTTGGTTACG                 |
| PpSOK1 FW before                                                                             | GTCAGTGAACAGGCTTCAC                    |
| PpSOK1 RV after                                                                              | GGTTCGAAATCACTCCGG                     |
| PpSOK2 FW before                                                                             | CAGACGATCAATAAGGAGGGCACC               |
| PpSOK2 RV after                                                                              | GTCGAGTAGGGTGCGGGGAG                   |
| PpSOK3 FW before                                                                             | GCCGACATCCCGAAATCTGCC                  |
| PpSOK3 RV after                                                                              | GTTGGGCCTTGTATTCAATAAAG                |
| PpSOK4 FW before                                                                             | CTGCTTGATAGTCTTTGATAATG                |
| PpSOK4 RV after                                                                              | CAAGCCCCGCCAAGGTGATGCA                 |
| 35S-mCitrine-MpSOSEKI                                                                        |                                        |
| CA74-MpSOSEKI fw cacc:                                                                       | caccATGGTTCTGGTAGGTCAAGGTATG           |
| CA75-MpSOSEKI rv stop                                                                        | TTATTGCAGTCGAGTCCGTATG                 |



**Table S5: DIX domain sequences (Related to STAR Methods)**

|                                                                                                                                                                                                                                                                                                                                                                                                                                                                                                                                                          |
|----------------------------------------------------------------------------------------------------------------------------------------------------------------------------------------------------------------------------------------------------------------------------------------------------------------------------------------------------------------------------------------------------------------------------------------------------------------------------------------------------------------------------------------------------------|
| <p><i>Constructs derived from gene synthesis (gBlocks)</i></p> <p><b>X</b>: amino acid remaining from TEV protease cut<br/> <b>G</b><u><a href="#">AMAGSSTGGGG</a></u> and <u><a href="#">NPQPEMAPPVHEPR</a></u>: non-native flanking sequences</p>                                                                                                                                                                                                                                                                                                      |
| <p><i>Cryptosporidium parvum</i></p> <p>GAGGGTCTTATCACTGTGTACTACTTCATTCCATCGGATGGCGACAAGGAAAACAACC<br/>         CCAACACTTTCAAGGTTAAGGGAACCCACTCTACTCTGACGACAAAACAATTAAGGA<br/>         TAGCTTCCCCTGCCAGGAATTTACTATTTTCGCTTCAAGGTTTCGCGTCGGCAACACGT<br/>         ATGATGGATGGACCCCTTAAATGACGATGACATTGTTCCATTATATGACGATGCAATT<br/>         ATCGCCAAAGTTCTTCGTATC</p> <p><b>Protein:</b><br/>         SNEGLITVYYFIPSDGDKENNPNTFKVKGTHSTLTTKQIKDSFPLPGIYYFRFKVVRVGN TYA<br/>         WMDPLNDDDIVPLYDDAIIAKVLRIN</p>                                           |
| <p><i>Paramecium tetraurelia</i></p> <p>AAGCAATTTACGCTGATTTATTACGTTGTCCCTCAAGATAACGATGATGTCGAAATTCC<br/>         CAACGCATTTGGTATCGGTAAACAGGTAGACCAAATCACACTGAAGGACATCAAACT<br/>         TCTTTCCGCTTCAGGGAGAATATATTTTCCGCTTCCGCTACAAGACTTCGCATAATAC<br/>         TGTCTGGTTGGACTTGCCAACACTGACACCGCACAGATTCCATTATTTAATTCGCGTATTC<br/>         TTATTAAGGCGACACGTATT</p> <p><b>Protein:</b><br/>         MKQFTLIYYVVPQDNDDVEIPNAFGIGKQVDQITLKDIKTSFPLQGEYIFRFYKTSHTVW<br/>         LDLPTDTAQIPLFNSRILIKATRIS</p>                                              |
| <p><i>Ectocarpus siliculosus</i></p> <p>ATCCGCTATTTTATTCCAGCGGATGGCGACGACCCGTCGCACCCCAACGTTTTTTCAGTT<br/>         GCCCTCTGGCCTGGTCGGAAGCGGGAGTGTACGTTGTGGCGACGTAGAACGTCACTTT<br/>         CCATTACCGGGTCGTTACCACTTTCGCTTCAAGAAGAAGTTCCGCGATGCTTTTGTGTG<br/>         GGATAGACATTGCTGATCCCGGCGCGGCAGTCCCAAGTTGTGATGGAGTGTTACGGCC<br/>         AAAATC</p> <p><b>Protein:</b><br/>         MIRYFIPADGDDPSHPNVFQLPSGLVGSVRCGDVERHFPLPGRYHFRFKKKFRDAFVW<br/>         VDIADPGAAPVSCDGVFTAKITRLSD</p>                                                             |
| <p><i>Plasmodium falciparum</i></p> <p>ACCGTGGTGTTTTATCATATTATTAACGATAAAGAAGATAAAAACAGCCAGAACGTGT<br/>         TTTATATTCTGAAACCGATTGGCAGCATTACCCTGAAAGATATTAACATGAATTTCCG<br/>         CTGATGGGCACCTATCATTTTCGCTTTAAATCTGCATAACAACATTCCGGCGTGGGT<br/>         GGATGTGACCGATGAAAGCAGCCCGGTGCCGAGCCTGAACAGCTGCATTTATGCGAA<br/>         AGTGCTGCGCCTG</p> <p><b>Protein:</b><br/> <u><a href="#">GAMAGSSTGGGGKPTVVFYHIINDKEDKNSQNVFYILKPIGSITLKD IKHEFPLMGTYHFRF</a></u><br/> <u><a href="#">KILHNNIPAWVDVTDEGSPVPSLNSCIYAKVLR LSNPQPEMAPPVHEPR</a></u></p> |

*Tetrahymena thermophila*

AAGGTTATTTCCAACGTGTTCTACCATATTCCTCAGGACAAGGACGACCCCGACATTCC  
TAATGTCTTCTGTGTCCCAAGAGCCAGGAAGAAATTCGTCTTGCAGACATCAAGTCC  
TACTTTCTCTTAATGGTCAATATATCTTCCGCTTTAAGTATCGTTATAACAACCAAGTT  
GTCTGGATGGACATCCCGGAAAATTCTAAGAACTGCCTATTTATGAGGGCCGTATT  
TTCTGAAGGCGACGCGCGTTCAG

**Protein:**

GAMAGSSTGGGGKVISNVFYHIPQDKDDPDIPNVFCVPKSQEEIRLADIKSYFPLNGQYIFR  
FKYRYNNQVWMD IPENSKKLPIYEGRIFLKATR VQNPQPEMAPPVHEPR

*Blastocystis hominis*

AAAAGACTAGTGTGTTGTATTATATCCCCGAGGACGGGGATGAAGCCGACCATCCGA  
ATGTAATGACACTGGATAAAAATGCCTCTCAGGTGACGTTGAAGGATATCCGCGAAGC  
GTTCCGATCCCTGGGACGTATTATTTTCGCTTCAAACGTACCTTCAAAAATAGCTGGA  
TTTGGTTTGACGTTACTGAGGATTCGGAAGTAGTCCGAAATTTGACGGTCTGATCTTT  
GAAAAGCGACGCGC

**Protein:**

GAMAGSSTGGGGSKKTSVLYYPEDGDEADHPNVMTLDKNASQVTLKDIREAFPIPGTY  
FRFKRTFKNSWIWFDVTESEVVPKFDGLIFVKATRLNPQPEMAPPVHEPR

*Marchantia polymorpha*

GTGGTGTACTACCTTTCACGCGGAGGGCAATTGCAACAGCCCCATCTGATTGATGTCC  
CCGTGAGCACCCACTCTAACGGATTGTACTTACGCGACGTAACGTCGTCTTACCAG  
CATTCGCGGAAAAGGAATGGGGGATTCATTTTCATGGAGTTGCAAGCGCAACTATAAA  
AACAATTTTCATCTGGCAGGACTTGGCAGACGATGATAAAAATTCTTCTCTTAGTGACG  
GTGAACCTGTGCTGAAAGGTTTCGGAGTTGTAC

**Protein:**

GTKVQVVYYLSRGGQLQPHLIDVPVSTHSNGLYLRDVKRRLTSIRGKGMGDSFSWSCKR  
NYKNNFIWQDLADDDKILPLSDGELVLKGSELYTGFQEKAE

*Physcomitrella patens SOK2*

GTGATTTATCTTCTTTCAAAGGAGCAGAGCAAGATGATCATCCGCACATGATTCAAG  
TGCAGTACCCAAGTCACCAGCACGCACCGACGCTGCGCGATGTCAAGTTCCGTTTAAAC  
GGCCCTTCGCGGGCGTGGAATGCCAGACTCTATTTCGTGGTCCTATAAGCGTTCCTACA  
AGGGTACATTCATTTGGTGTGACGTATTCGATGGAGACGACATCCTGCCG  
CTGAGTGAA

**Protein:**

SESYHKIEVIYLLSKGAEQDDHPHMIQVQYPSHQHAPTLRDVKFRLTALRGRGMPDSYSW  
SYKRSYKGTFIWCDVFDGDDILPLSESGEYVLKALEVMD

**Constructs derived by PCR from cDNA's**

*Arabidopsis thaliana SOK1*

MESNGGGGEVRRVNLVYFLSRSGHVDHPHLLRVHLSRNGVFLRDVKKWLADARGDAM  
PDAFSWSCKRRYKNGYVWQDLLDDDLITPISDNEYVLKGSEILLSSPKEDYPNVEKK

*Arabidopsis thaliana* SOK3

GKYHQKIKK VQIVYYLSKNRQLEHPHFMEVLISPNGLYLRDVIERLNVLGRGMASMY S  
WSSKRSYRNGFVWHDLSEDDLILPANGNEYVLKGSSELFDESNSD

*Arabidopsis thaliana* SOK4

SRERIVPVVYYLSRNGRLDHPHFIEVPLSSHNGLYLKDVINRLNDLRGNGMACLYSWSSKR  
TYKNGFVWYDLSDEDFIFPVHGQEYVLKGSQILD
